# Supplementary material
Source: publisher site journal article supplement (https://www.degruyterbrill.com/publication/isbn/9783110268188/downloadAsset/9783110268188_Contents.pdf)
Supplement: Supplementary file 1 [file 9783110268188_Contents.pdf]

# Table of Contents

**Acknowledgments — vii**

**Abbreviations — xiv**

**Introduction — 1**

## **Chapter 1: Shanghai — 5**

Beginnings of the Treaty Port — 6

Shanghai until the Sino-Japanese War of 1937 — 11

Baghdadi (Sephardi) and Russian (Ashkenazi) Jews — 17

Shanghai's Russian and Japanese Communities — 24

Aftermath of the 1937 Hostilities — 30

Shanghai-Harbin-Tianjin — 34

## **Chapter 2: Germany's China Policy, Forced Emigration and the Search for Alternative Destinations — 39**

The First Jewish Arrivals in China, 1933–1934 — 39

Germany's East Asian Politics between China  
and Japan — 43

Money, Trade, Arms, and Military Missions — 49

Forced Emigration — 54

Alternative Destinations: Manchukuo, the Philippines,  
Yunnan — 60

## **Chapter 3: “To Suffer a Martyr's Death Rather than Perish in Shanghai” or to “Die as Free Men in Shanghai” — 71**

The Journeys — 72

The Refugee Flood and its Cessation — 77

Factors Limiting Sea Travel — 79

Responses in Shanghai — 87

The Permit System — 98

Legitimate and Forged Permits — 106

Overland Routes — 110

## **Chapter 4: Strangers in Shanghai — 117**

Getting Settled: Flats and Heime — 118

Entertainment — 126

Litigation — **133**  
Publishing — **137**  
Institutional Development: Synagogues, Burial Societies  
and Cemeteries, Hospitals and Schools — **146**  
To Leave Shanghai — **152**

**Chapter 5: Years of Misfortune: 1941–1945 — 157**

Eastjewcom, Laura Margolis,  
and the Polish Jews — **159**  
The Pacific War and the Jewish Communities — **164**  
Anti-Semitism, The Proclamation,  
and The “Designated Area” — **169**  
Life in the Ghetto — **177**

**Chapter 6: End of War and the Jewish Exodus — 189**

The Disaster of July 1945 — **190**  
Leaving China — **194**  
Shanghai Remembered — **197**

**Some Final Remarks — 207**

**Appendices — 211**

Appendix 1: Old and New Street Names Mentioned  
in Text — **211**  
Appendix 2: Journals and Newspapers Published in  
Shanghai for the Jewish Communities  
1939–1946 — **211**  
Appendix 3: Documentary Films about Shanghai — **213**  
Appendix 4: Partial List of Published German and English  
Language Memoirs and Autobiographies — **220**  
Appendix 5: A Biographical Sketch  
of the Karfunkel Family — **221**  
Appendix 6: List of German Refugees Entering Shanghai  
Since 1937, Registration Made by  
Zangzou Police Station — **224**  
Glossary of Chinese Names and Terms — **225**

**Bibliography — 227**

Archives — **227**

Newspapers — **227**

Interviews — **227**

Books — **227**

Articles — **233**

**Index of Persons — 241**
